# Supplementary material
Source: PubMed Central journal article supplement (PMC3251079)
Supplement: 1100278108_pnas.201100278SI.pdf [file 1100278108_pnas.201100278SI.pdf]

# Supporting Information

Pardue and DeBaryshe 10.1073/pnas.1100278108

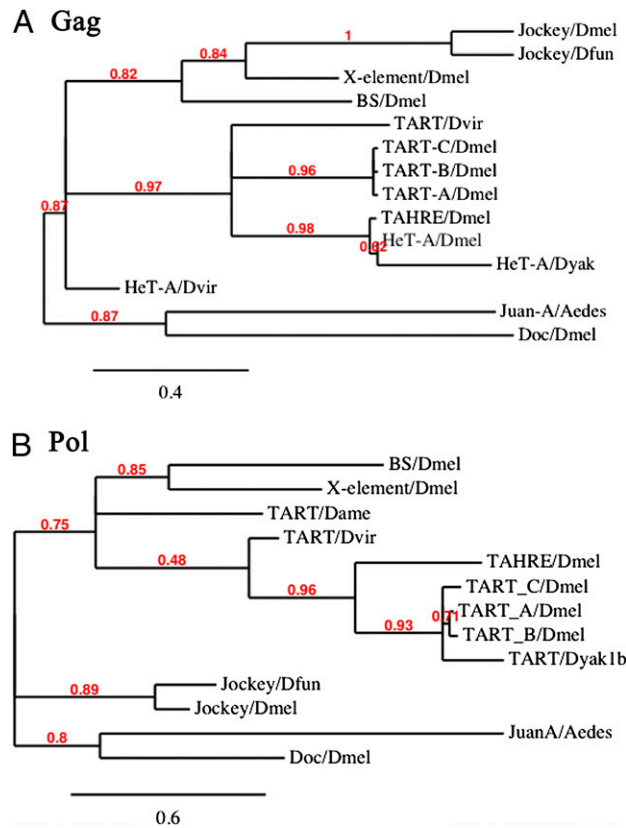

**Fig. S1.** Phylogenetic relationships of Gag (A) and Pol (B) amino acid sequences of non-LTR elements in the jockey clade. Elements are from several *Drosophila* species as well as *Juan-1* from *Aedes aegypti*. Analysis by One Click Phylogeny Analysis package available at [http://www.phylogeny.fr/version2.cgi/simple\\_phylogeny.cgi](http://www.phylogeny.fr/version2.cgi/simple_phylogeny.cgi); alignment was done by MUSCLE with curation by G blocks, phylogeny determination by PhyML, and tree rendering by TreeDYN (1). Branch support values in red are the expectation values that a branch is a realistic description; support values less than 0.1 have been collapsed. (A) Gag proteins. (B) Pol proteins. Elements shown are those elements listed in Fig. 1 plus *HeT-A<sup>yak</sup>*, AF043258 (*D. yakuba*); *jockey<sup>mel</sup>*, M22874; *Doc<sup>mel</sup>*, X17551; *jockey<sup>fun</sup>*, M38437 (*D. funebris*); *BS<sup>mel</sup>*, Flybase FBgn0000224; *X<sup>mel</sup>*, AF237761; *TART<sup>yak1b</sup>*, AP468024; *TART<sup>ame</sup>*, AY219710 (*D. americana*); and *Juan-A<sup>Aedes</sup>*, M95171.

1. Dereeper A, et al. (2008) Phylogeny.fr: robust phylogenetic analysis for the non-specialist. *Nucleic Acids Res* 36:W465-9.
